# Supplementary material for: Construction of a rapid electrochemical biosensor consisting of a nanozyme/aptamer conjugate for waterborne microcystin detection
Source: Royal Society of Chemistry journal article supplement (doi:10.1039/d3an00391d), 2023-01-01
Supplement: d3an00391d1.pdf [file d3an00391d1.pdf]

## Supplementary Material

### Construction of Rapid Electrochemical Biosensor Consisted of nanozyme/aptamer conjugate for waterborne microcystin detection

*Jeong Ah Park,<sup>†a</sup> Yein Kwon,<sup>†a</sup> Xuan Ai Le,<sup>†b</sup> Trung Hieu Vu,<sup>b</sup> Hanbin Park,<sup>a</sup> Hoseok Lee,<sup>c</sup> Hye Kyu Choid, Chulhwan Park,<sup>a</sup> Moon Il Kim<sup>\*b</sup> and Taek Lee<sup>\*a</sup>*

<sup>a</sup>Department of Chemical Engineering, Kwangwoon University, 20 Kwangwoon-Ro, Nowon-Gu, Seoul 01897, Republic of Korea.

<sup>b</sup>Department of BioNano Technology, Gachon University, 1342 Seongnamdae-ro, Sujeong-gu, Seongnam, Gyeonggi 13120, Republic of Korea.

<sup>c</sup>Department of Electrical and Computer Engineering, Seoul National University, 1 Gwanak-ro, Gwanak-gu, Seoul, Republic of Korea.

<sup>d</sup> Department of Chemical and Biomolecular Engineering, Sogang University, 35 Baekbeom-ro, Mapo-gu, Seoul 121-742, Republic of Korea

Keywords: Alternating current electrothermal flow; Aptamer; Electrochemical biosensor; Microcystin-LR detection; MnO<sub>2</sub> nanoflowers;.

#### **\*Address correspondence to:**

Prof. Moon Il Kim, moonil@gachon.ac.kr  
Department of BioNano Technology, Gachon University  
1342 Seongnamdae-ro, Sujeong-gu, Gyeonggi, Republic of Korea  
Phone: (+82)-31-750-8563

Prof. Taek Lee, tlee@kw.ac.kr  
Department of Chemical Engineering, Kwangwoon University  
Kwangwoon-Ro, Nowon-Gu, Seoul, Republic of Korea  
Phone: (+82)2-940-5771

<sup>†</sup> These authors contributed equally

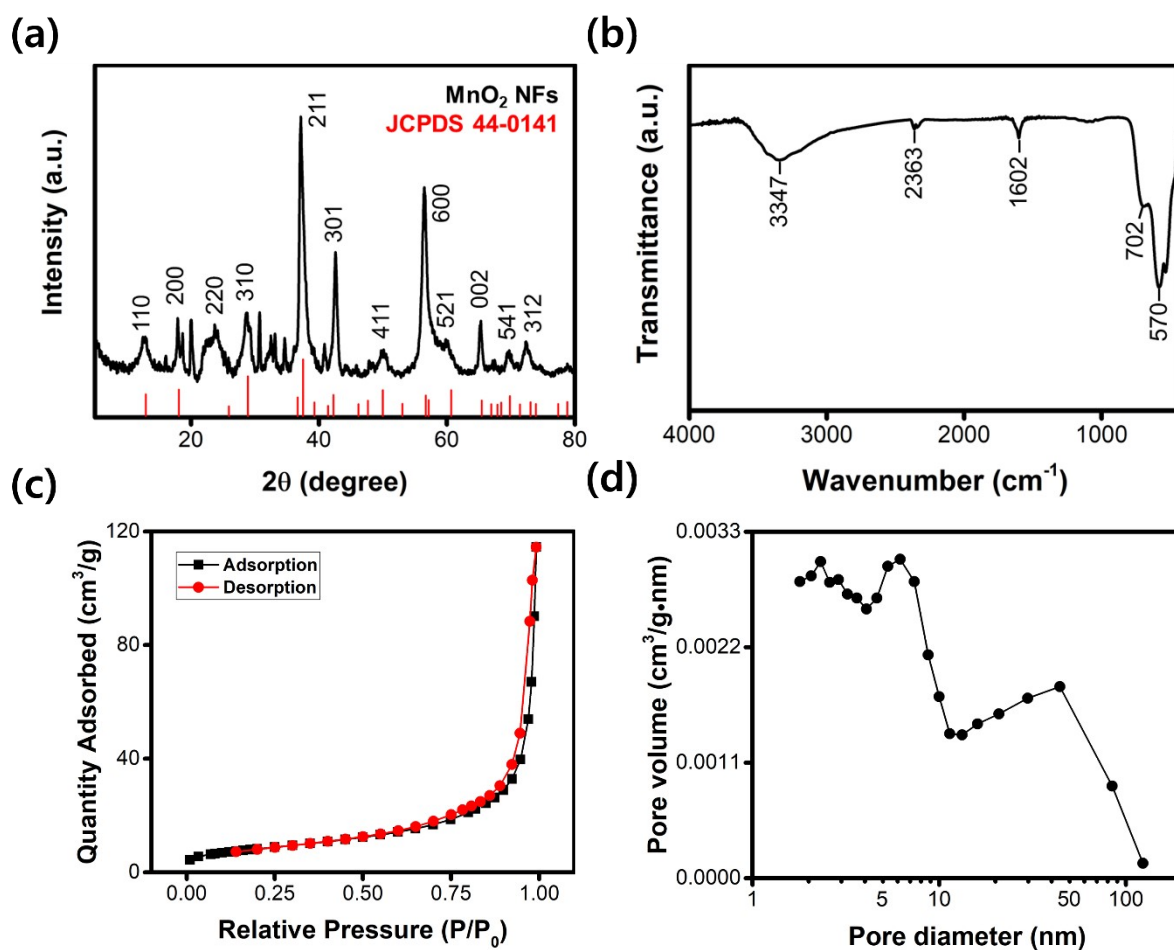

**Fig. S1** (a) XRD pattern, (b) FT-IR spectra, (c) nitrogen adsorption–desorption isotherms, and (d) pore size distribution of MnO<sub>2</sub> NFs.

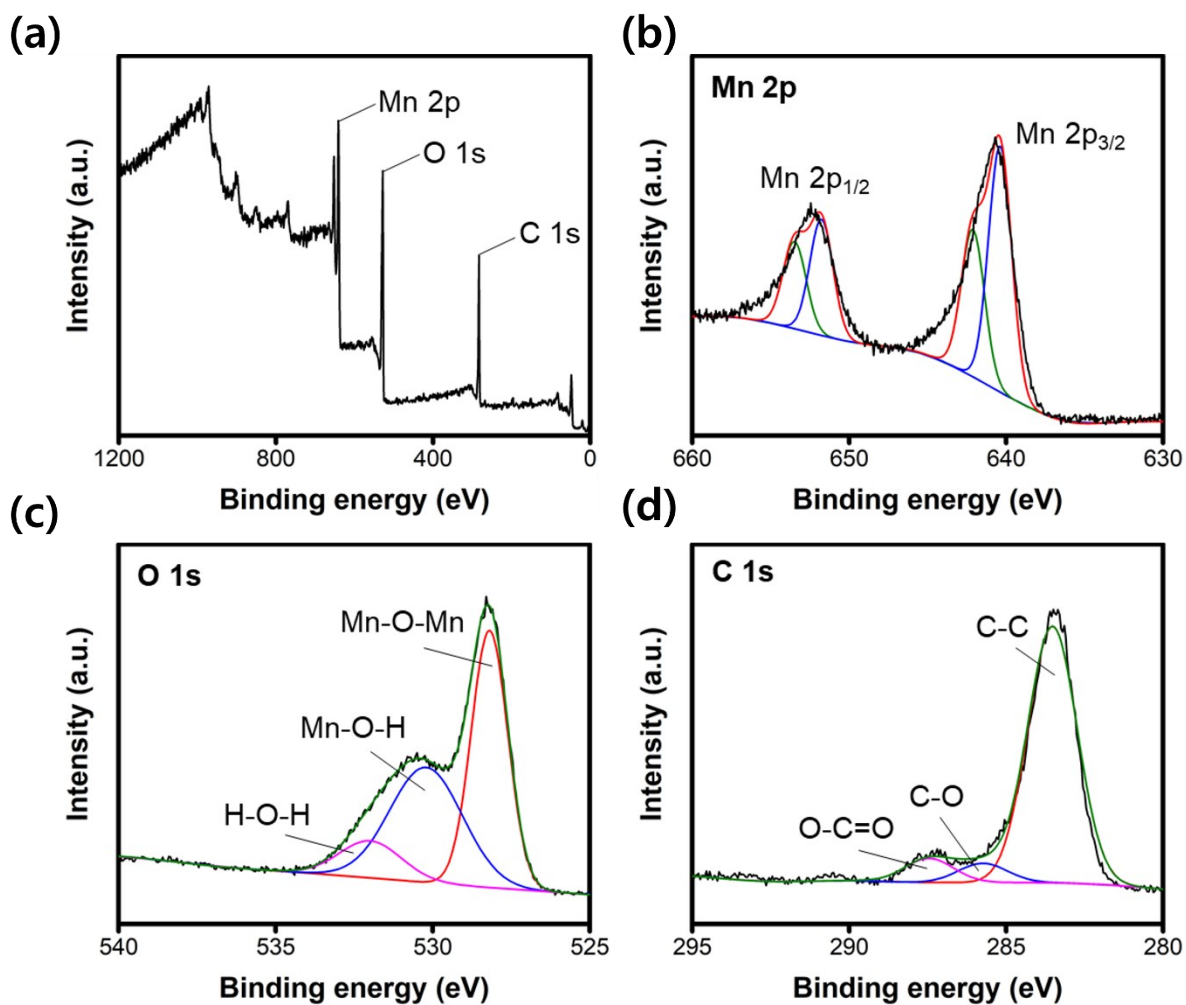

**Fig. S2** (a) XPS full scan spectrum of MnO<sub>2</sub> NFs, and high-resolution XPS spectra of (b) Mn 2p, (c) O 1s, and (d) C 1s. In Mn 2p spectra, the blue and green lines represent Mn<sup>3+</sup> and Mn<sup>4+</sup>, respectively.

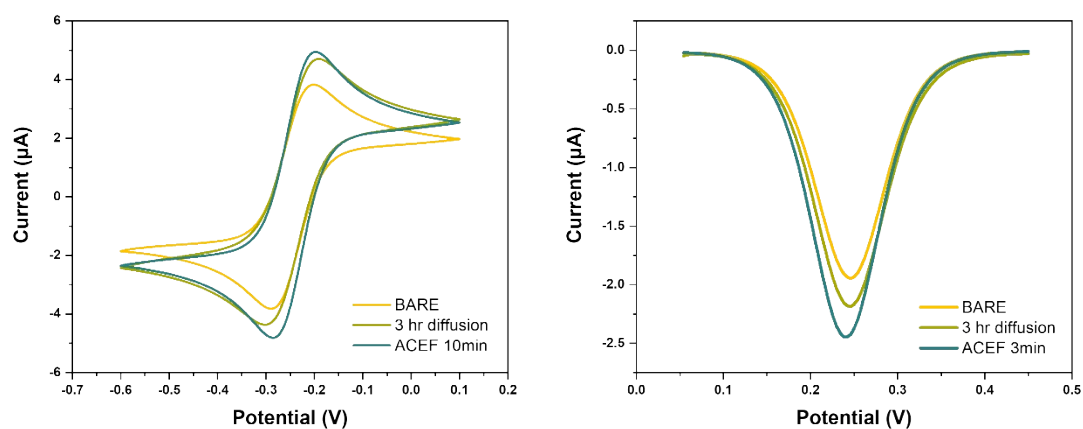

**Fig. S3** (a) CV of bare (yellow line), MC-LR/MnO<sub>2</sub>/MC-LR Aptamer after 3 h reaction by diffusion (light green line), and MC-LR/MnO<sub>2</sub>/MC-LR Aptamer after 10 min reaction with ACEF (blue-green line), (b) DPV of bare (yellow line), MC-LR/MnO<sub>2</sub>/MC-LR Aptamer after 3 h reaction by diffusion (light green line), and MC-LR/MnO<sub>2</sub>/MC-LR Aptamer after 10 min reaction with ACEF (blue-green line).

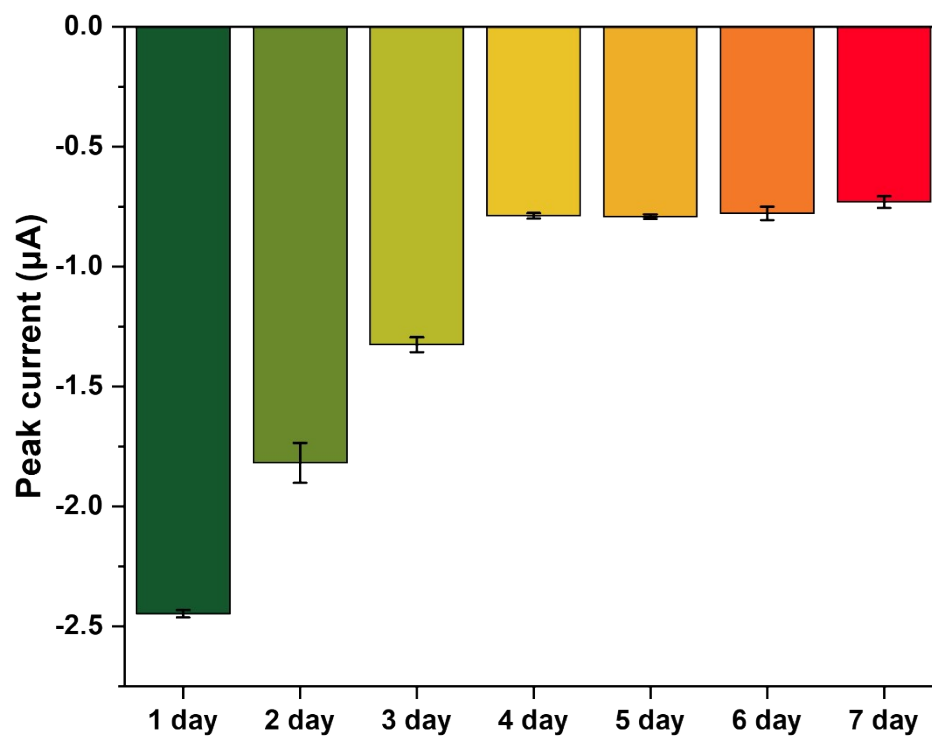

**Fig. S4** Shelf-life test of the electrochemical MC-LR biosensor (in freshwater).

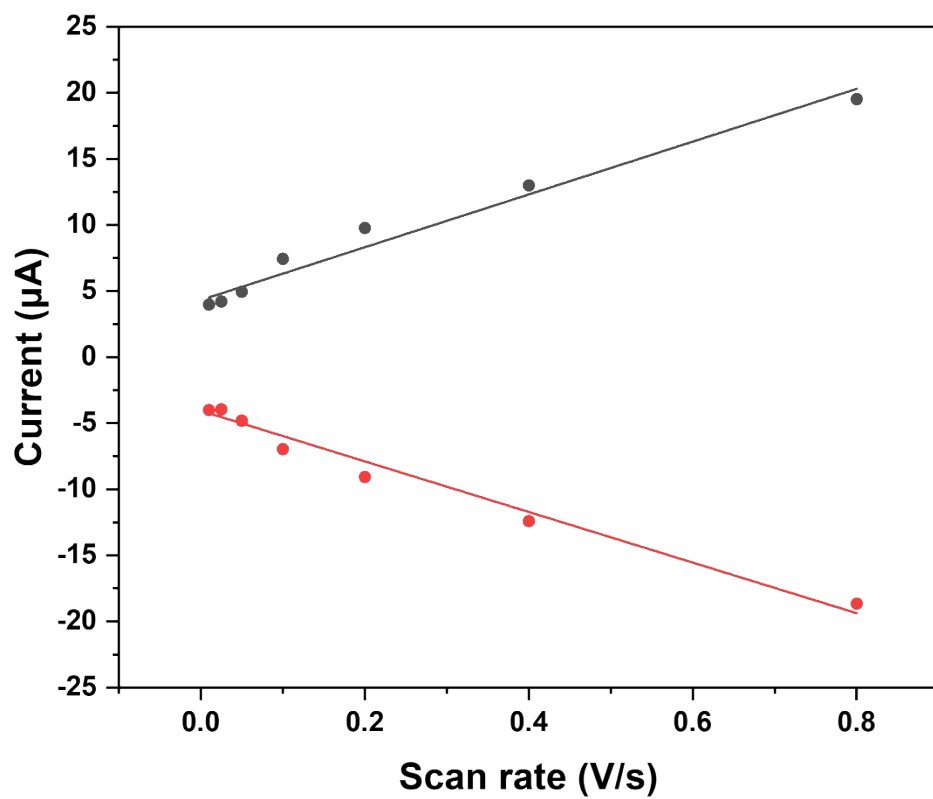

**Fig. S5** Linear regression between the current at 0.2 V, 0.3 V and scan rate (MC-LR/MnO<sub>2</sub>/MC-LR Aptamer)

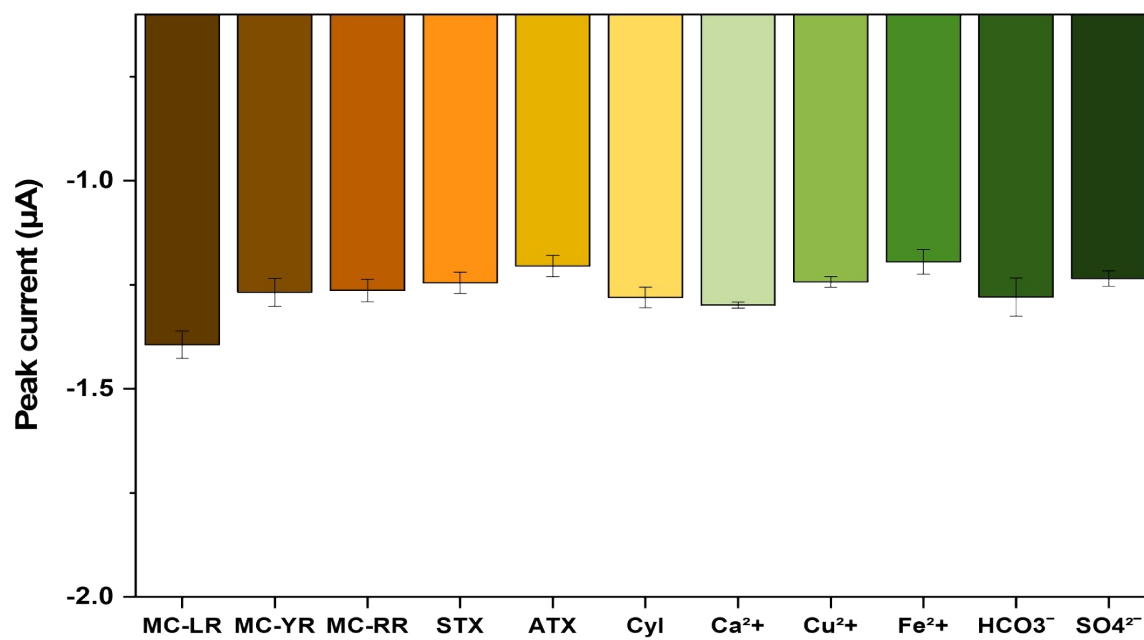

**Fig. S6** Peak current at DPV graph based on selectivity at 100 pg/mL MC-YR, MC-RR, ATX, STX, cylindrospermopsin and other inorganic ions in freshwater.

**Table S1** Encapsulation yields of microcystin aptamers, with and without amine modifications, conjugated to the MnO<sub>2</sub> NFs.

| <b>Aptamer</b>   | <b>Sequence</b>                                                                                          | <b>Encapsulation yields (%)</b> |
|------------------|----------------------------------------------------------------------------------------------------------|---------------------------------|
| MC-LR            | 5' - GGC GCC AAA CAG GAC CAC CAT GAC<br>AAT TAC CCA TAC CAC CTC ATT ATG CCC<br>CAT CTC CGC /3AmMC6T/ -3' | 89.49 ± 3.68                    |
| MC-LR<br>control | 5' - GGC GCC AAA CAG GAC CAC CAT GAC<br>AAT TAC CCA TAC CAC CTC ATT ATG CCC<br>CAT CTC CGC - 3'          | 79.11 ± 1.00                    |
